# Supplementary material
Source: PubMed Central journal article supplement (PMC7979484)
Supplement: NIHMS1655269-supplement-Supplemental_Data_File___doc___tif__pdf__etc___1.pdf [file NIHMS1655269-supplement-Supplemental_Data_File___doc___tif__pdf__etc___1.pdf]

**Helping Individuals with Firearm Injuries (HIFI)**  
**UW Dept. of Epidemiology**  
**Study Cell: 206-446-8914**  
**Study Email: hifihelp@uw.edu**

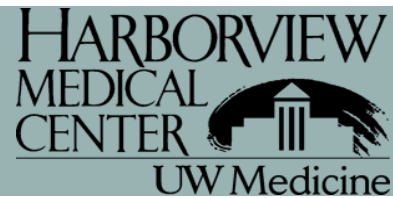

## Community Resources

### EMERGENCY RESOURCES

#### For Men

**Bread of Life Mission** .....206.682.3579 Ext.100  
 97 S Main St, Seattle Walk in, M-F, 10am-4pm.  
 Chapel service req'd. \$5/night, first 2 nights free.

**Compass Housing Alliance** .....Walk In Only  
 Client Services Office, 77 S Washington St, Seattle  
 Walk in, M-F, 9am-4pm. \$21/week. Entrance  
 to building is around the corner under the Alaskan  
 Way Viaduct.

**Seattle's Union Gospel Mission** ...206.622.5177  
 318 2nd Ave Extension S, Seattle Call or walk in,  
 9am-6:30pm, to reserve a ticket for the night.  
 Those without a ticket can line up for an un-  
 claimed mat at 7:15pm. ID req'd.

**Para Español**.....206.622.5177 Ext. 473

#### For Women

**DESC** .....206.464.1570 x3033  
 517 3rd Ave, Seattle Walk in daily, 7am-4:45pm.  
 Serves women anyone identifying as female.

**Hope Place** ..... 206.628.2008  
 3802 S Othello St, Seattle Call for screening, M-F,  
 8:30-9am. Includes mandatory spiritual activities.  
 \$9.08 for credit check.

**Hospitality House** ..... 206.242.1860  
 1419 SW 150th St, Burien Call for screening, M-  
 Th, 1-7pm. Serves single women, ages 18 and  
 older. No fees. Can stay up to 3 months.

#### For Youth

**Arcadia House** .....253.740.7189  
 915 H Street SE, Auburn Co-ed overnight shelter  
 for young adults, 18-24. Line up outside at 8:30pm  
 for intake. Must leave by 7am.

**New Horizons** .....206.374.0866 Ext. 209  
 2709 3rd Ave, Seattle Walk-in Su-Th, 7-8pm for  
 intake. Serves young adults age 18-23. No Pets.  
 ID or Case Manager letter required.

#### Domestic Violence

**DAWN**..... 425.656.7867  
 Call for intake 24 hours, daily. Serves women,  
 including Trans Women, with or without children.

**LifeWire** .....425.746.1940  
 Call for intake 24 hours, daily. Survivors may be of  
 any gender, with or without children. Occasionally  
 provides motel vouchers.

To inquire about more Emergency  
 Housing options, please call 2-1-1.

### WORK

**Casa Latina** ..... 206.956.0779 Ext. 112  
 317 17th Ave S, Seattle Mandatory orientation  
 1st & 3rd M each month, 7am, Photo ID req'd.

**Millionair Club** ..... 206.728.5627  
 2515 Western Ave, Seattle Call to see if appli-  
 cations being accepted. Valid state or govern-  
 ment ID and Social Security card req'd. Cannot  
 serve felons. Registered clients, walk in: M-Sa,  
 6-10am.

Please visit: [www.crisisclinic.org/education/2-1-1-community-resources/](http://www.crisisclinic.org/education/2-1-1-community-resources/) for resources for  
**Job Seeking Skills, Job Training, and Job  
 Search.**

### HOUSING

#### King County Housing Authority

Phone:(206) 574-1248. Hours: Applications  
 Center Phone: M-F, 8am-4:30pm. Management  
 Offices: M-F, 9am-noon. [www.kcha.org](http://www.kcha.org)  
 Operates public housing properties throughout  
 King County, excluding Seattle and Renton.  
 serves low-income households. Housing Choice  
 Voucher (Section 8) rental subsidies for very  
 low-income households.

#### Housing Search Northwest

Phone: (877) 428-8844. Hours: M-F, 6am-5pm.  
[www.housingsearchnw.org](http://www.housingsearchnw.org) Provides searcha-  
 ble, real-time listings of available low- and mar-  
 ket-rate housing, including senior housing op-  
 tions.

### HOT MEALS

**Bread of Life Mission** 206.682.3579, Ext 100  
 97 S Main, Seattle Lunch: M-F, 12:15pm. Din-  
 ner : M-Sa, 5:30pm. Optional Chapel Service at  
 6:30. Serves adults and families.

**El Centro de la Raza** ..... 206.973-4401  
 2524 16th Ave S, Seattle M-F, noon-1pm.  
 Serves anyone in need.

**Millionair Club** .....206.728.5627  
 2515 Western Ave, Seattle Breakfast: M-F, 6:15  
 -7am. Lunch: M-F, Noon-1:30pm. Serves any-  
 one in need.

**Union Gospel Mission** .....206.622.5177  
 318 2nd Ave Extension S, Seattle Daily, 7-  
 8:30am, noon-12:45pm, 5-5:30pm, 5:30-  
 6:30pm. No noon meal Su. Serves anyone in  
 need.

### EDUCATION

**FamilyWorks**.....(206) 694-6727  
 Address:1501 N 45th St, Seattle, WA, 98103.

Hours: M, 9:30am-noon; Tu-Th, 9:30am-5pm; F,  
 9:30am-3pm. Provides pre-employment services to  
 anyone. Offers one-on-one employment advice,  
 public computer availability for Internet job search  
 and computer tutoring.

**Goodwill Adult Education**.....(206) 860-5791  
 Address:700 Dearborn Pl S, Seattle, WA, 98144.

Hours: M-F, 8:30am-4:30pm. Provides adult basic  
 education, including computer classes, GED prepa-  
 ration and ESL, to those age 16 and older with mul-  
 tiple barriers to employment. Website:

[www.seattlegoodwill.org](http://www.seattlegoodwill.org)

Please visit: [www.crisisclinic.org/education/2-1-1-community-resources/](http://www.crisisclinic.org/education/2-1-1-community-resources/) for resources for **Computer  
 Classes, ESL Classes, GED Classes, Homeless Stu-  
 dent Liaisons, School Supplies, and Tutoring/  
 Homework Help.**

### ADDICTION/RECOVERY

#### Washington Recovery Help Line

Call 1-866-789-1511 (toll-free). 206-461-3219  
 (TTY). State-wide 24-hour/day support for people  
 dealing with substance abuse, mental health issues;  
 and problem gambling; provides crisis intervention  
 and referrals to treatment & support services in  
 Washington state.

**Evergreen Treatment Services** 206-223-3644.

[www.evergreentx.org/](http://www.evergreentx.org/)

#### Harborview: Addictions Treatment Programs

206-744-9657. [http://www.uwmedicine.org/locations/  
 addictions-program-harborview](http://www.uwmedicine.org/locations/addictions-program-harborview)

### OTHER RESOURCES

**Washington State Department of Social and  
 Health Services (DSHS)**- Seattle Office: 2106 2nd  
 Ave Seattle, WA 98121. Phone:1-877-501-2233.

[www.washingtonconnection.org](http://www.washingtonconnection.org)

Call or visit website to apply for government food  
 assistance/EBT, cash assistance, TANF, WIC, child-  
 care, housing, and other benefits.

#### Harborview Center for Sexual Assault & Trau- matic Stress-

Address: 401 Broadway, Suite 2075  
 Seattle, WA 98104. Phone: (206) 744-1600. Center  
 provides direct services, education and consultation  
 for health, mental health, and legal professionals;  
 promotes prevention and works with communities to  
 promote social change.

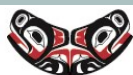

SCHOOL OF PUBLIC HEALTH  
 UNIVERSITY of WASHINGTON

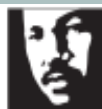

King County

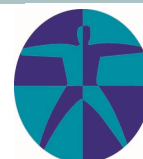

HARBORVIEW  
 INJURY PREVENTION  
 & RESEARCH CENTER
