# Supplementary material
Source: PubMed Central journal article supplement (PMC7979484)
Supplement: NIHMS1655269-supplement-Supplemental_Data_File___doc___tif__pdf__etc___2.pdf [file NIHMS1655269-supplement-Supplemental_Data_File___doc___tif__pdf__etc___2.pdf]

**Appendix B: Multidisciplinary Team Membership and Areas of Expertise**

---

**Organization**

---

Urban League

Public Defender Association

Navos (a regional mental health provider)

Harborview Medical Center Addiction Services

Therapeutic Health Services

Harborview Medical Center Office Based Opiate Treatment

Harborview Medical Center Housing Coordinator

Seattle Police Department

Harborview Medical Center Housing Coordinator

Harborview Medical Center Employment Specialist

City of Seattle Human Services Department

Systems Integration Coordinator

King County Executive's Office

HMC Psychiatry and Behavioral Health Patient Care Services

---
