# Supplementary material
Source: PubMed Central journal article supplement (PMC7979484)
Supplement: NIHMS1655269-supplement-Supplemental_Data_File___doc___tif__pdf__etc___4.pdf [file NIHMS1655269-supplement-Supplemental_Data_File___doc___tif__pdf__etc___4.pdf]

## Appendix D: Standardized assessments included in follow up surveys

| Included in: |            | Survey scale or item                                                              | Measures                                                                                                                         |
|--------------|------------|-----------------------------------------------------------------------------------|----------------------------------------------------------------------------------------------------------------------------------|
| Long form    | Short form |                                                                                   |                                                                                                                                  |
| X            | X          | Locating questions                                                                | Contact information questions to increase likely hood of reaching the subject during the next follow up period                   |
| X            | X          | Patient Health Questionnaire (PHQ-8) <sup>24</sup>                                | Depression<br><i>Note: Short form survey used the PHQ-2</i>                                                                      |
| X            | X          | Short Form Health Survey (SF-12) <sup>27</sup>                                    | Health-related quality of life<br><i>Note: Short form survey included only the overall global health question from the SF-12</i> |
| X            | X          | The Alcohol Use Identification Test (AUDIT) <sup>28</sup>                         | Risky alcohol use<br><i>Note: Short form survey used only the first three questions on the AUDIT survey</i>                      |
| X            | X          | Alcohol, Smoking and Substance Involvement Screening Test (ASSIST) <sup>29</sup>  | Lifetime substance use and substance use disorders<br><i>8 item scale</i>                                                        |
| X            | X          | Critical Time Intervention (CTI) Satisfaction                                     | Satisfaction with the CTI intervention program<br><i>Note: Asked only of intervention patients</i>                               |
| X            | X          | Firearm-related behaviors                                                         | Firearm ownership, carrying and storage behaviors<br><i>Note: This module was added March 2017</i>                               |
| X            |            | Posttraumatic Stress Disorder Checklist – Civilian Version (PCL-C) <sup>23</sup>  | Posttraumatic stress disorder<br><i>17 item scale</i>                                                                            |
| X            |            | Impulsive-Premeditated Aggression Scale (IPAS)                                    | Impulsive and premeditated aggressive behavior<br><i>30 item scale</i>                                                           |
| X            |            | Conflicts Tactics Scale (CTS)                                                     | Interpersonal violence<br><i>6 item sub-scale for physical assault</i>                                                           |
| X            |            | Happiness Scale <sup>26</sup>                                                     | Satisfaction with specific areas of life                                                                                         |
| X            |            | Service utilization questions                                                     | Use of physical and mental health services                                                                                       |
| X            |            | Self-Reported Delinquency (SRD) items of the Pittsburgh Youth Study <sup>45</sup> | Criminal justice system involvement, violence, criminal outcomes, conviction(s) and incarceration(s)<br><i>26 item scale</i>     |
| X            |            | Multidimensional Scale of Perceived Social Support (MSPSS) <sup>25</sup>          | Perceived social support<br><i>12 item scale</i>                                                                                 |
| X            |            | Neighborhood safety questions                                                     | Perceived exposure to disorder and violence<br><i>8 item scale</i>                                                               |
| X            |            | Educational attainment                                                            | Educational attainment and activities<br><i>“What is the highest grade or year of school you completed?”</i>                     |
| X            |            | Employment status                                                                 | Employment status<br><i>“In the last month, what were you doing most of the time?”</i>                                           |
| X            |            | Housing status                                                                    | Type of housing<br><i>“What is your current living situation?”</i>                                                               |
| X            |            | Marital status                                                                    | Marital status<br><i>“What best describes your current relationship status?”</i>                                                 |

Note: At the beginning of the study, patients completed the same long form survey at each follow-up time point after hospital discharge. Starting September 2017, a shorted version of this form was used at the 1, 3, and 9 month time points to reduce RA and patient data collection burden. Patients who received short form surveys still completed the long form survey at 6 and 12 months following hospital discharge.
