# Supplementary material
Source: PubMed Central journal article supplement (PMC7979484)
Supplement: NIHMS1655269-supplement-Supplemental_Data_File___doc___tif__pdf__etc___7.pdf [file NIHMS1655269-supplement-Supplemental_Data_File___doc___tif__pdf__etc___7.pdf]

## Appendix G: Frequency and Duration of Contacts between patients and the Support Specialist and Areas of Need

**Table 1.** Frequency and duration of contacts with patients in the intervention group (n=72)

| Statistic      | Number of all contacts | Number of in-person contacts | Duration of contacts in minutes |
|----------------|------------------------|------------------------------|---------------------------------|
| Mean           | 27.3                   | 2.4                          | 274.2                           |
| Median         | 25.5                   | 2.0                          | 218.5                           |
| Std. Deviation | 11.9                   | 2.3                          | 175.9                           |
| Minimum        | 10.0                   | 0                            | 49                              |
| Maximum        | 77.0                   | 14.0                         | 1030.0                          |

**Figure 1.** Distribution of the frequency of all contacts with patients in the intervention group (n=72)

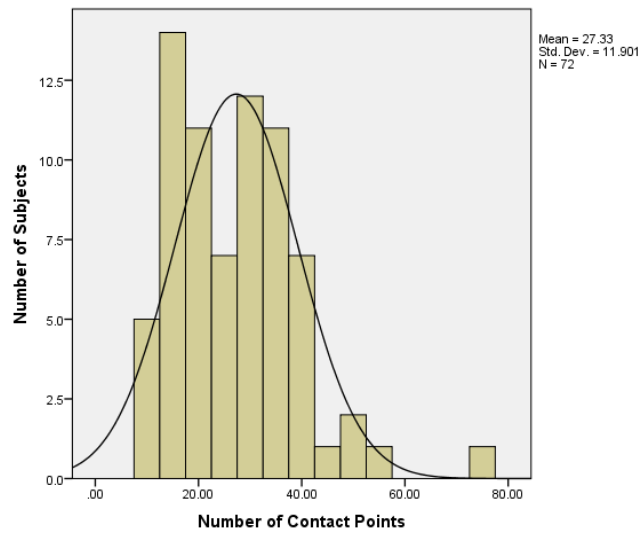

**Figure 2.** Distribution of the frequency of in-person contacts with patients in the intervention group (n=72)

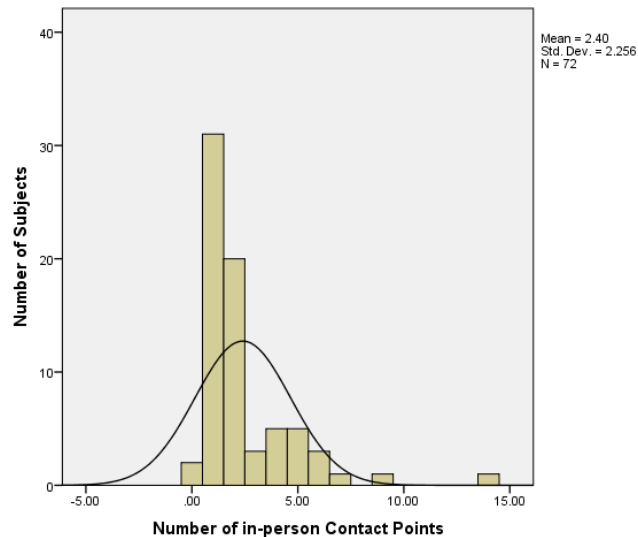

**Figure 3.** Distribution of the duration of all contacts with patients in the intervention group (n=72)

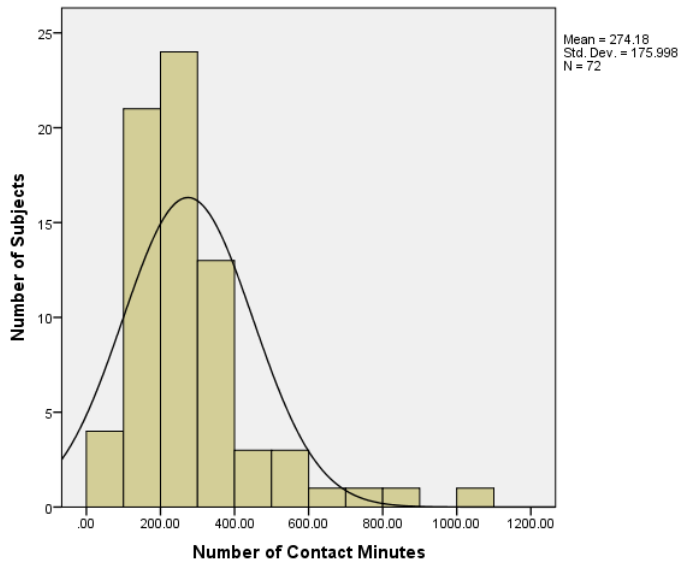

**Table 2.** Descriptive summary of identified goals among patients receiving CTI (n=73)

| Goal Domain                              | Example                                                                                                                     | Patients Reporting Domain, % |
|------------------------------------------|-----------------------------------------------------------------------------------------------------------------------------|------------------------------|
| Money management                         | Assistance with crime victims' compensation                                                                                 | 84.79                        |
| Getting back to normal                   | Re-established pre-injury routine and physical activity                                                                     | 46.6                         |
| Housing crisis prevention and management | Referral to short- and long-term housing services                                                                           | 43.8                         |
| Mental health management and care        | Referral to treatment<br>Assistance with treatment entry or forms<br>Practice self-calming techniques                       | 37.0                         |
| Employment                               | Working with employers to allow leave time for injury recovery                                                              | 28.8                         |
| Legal issues                             | Referral to legal service                                                                                                   | 23.3                         |
| Education                                | Assistance with enrolling in training or educational programs to address post-injury needs                                  | 13.7                         |
| Self-improvement                         | Assistance with making lifestyle changes spurred by events of the injury                                                    | 12.3                         |
| Family intervention                      | Facilitating discussion of post-injury needs with family members and caregivers<br>Referral of family members to counseling | 5.5                          |
| Substance use                            | Referral to counseling or treatment                                                                                         | 5.5                          |
| Time management                          | Help setting and attending appointments related to post-injury needs                                                        | 1.4                          |
| Daily living skills training             | Finding help to address basic tasks after injury                                                                            | 1.4                          |
