# Supplementary material
Source: PubMed Central journal article supplement (PMC7979484)
Supplement: NIHMS1655269-supplement-Supplemental_Data_File___doc___tif__pdf__etc___8.pdf [file NIHMS1655269-supplement-Supplemental_Data_File___doc___tif__pdf__etc___8.pdf]

## Appendix H: Secondary Outcome Analyses

**Table 1. Proportion of completed survey at each time point during follow-up**

| <b>Follow-up Month</b> | <b>Control (n=114), %</b> | <b>Intervention (n=118), %</b> | <b>Total (n=232), %</b> |
|------------------------|---------------------------|--------------------------------|-------------------------|
| 1                      | 58.8 (67/114)             | 68.6 (81/118)                  | 63.8 (148/232)          |
| 3                      | 57.0 (65/114)             | 63.5 (75/118)                  | 60.3 (140/232)          |
| 6                      | 57.9 (66/114)             | 54.2 (64/118)                  | 56.0 (130/232)          |
| 9                      | 50.9 (56/110)             | 56.0 (65/116)                  | 53.6 (121/226)          |
| 12                     | 62.5 (65/104)             | 58.9 (60/102)                  | 60.6 (125/206)          |

Note: As patients were followed for varying amounts of time depending on their enrollment date, the total patients who were eligible to complete each survey varied.

**Table 2. Self-reported secondary outcome average scores for each follow up survey**

| <b>Scales</b>          | <b>Baseline<br/>Mean (SD)</b> | <b>1 month<br/>Mean (SD)</b> | <b>3 months<br/>Mean (SD)</b> | <b>6 months<br/>Mean (SD)</b> | <b>9 months<br/>Mean (SD)</b> | <b>12 months<br/>Mean (SD)</b> |
|------------------------|-------------------------------|------------------------------|-------------------------------|-------------------------------|-------------------------------|--------------------------------|
| <b>PCL-C total</b>     |                               |                              |                               |                               |                               |                                |
| Control                | 32.0 (15.2)                   | 34.9 (16.5)                  | 30.8 (15.4)                   | 34.8 (16.6)                   | 35.2 (17.3)                   | 36.9 (17.6)                    |
| Intervention           | 36.0 (18.2)                   | 41.1 (19.3)                  | 43.3 (19.9)                   | 41.7 (18.3)                   | 37.2(17.3)                    | 40.1 (18.8)                    |
| <b>PHQ-8 total</b>     |                               |                              |                               |                               |                               |                                |
| Control                | 5.4 (5.8)                     | 5.9 (4.7)                    | 5.4 (5.2)                     | 6.0 (5.8)                     | 5.0 (5.6)                     | 5.9 (6.0)                      |
| Intervention           | 7.0 (6.8)                     | 8.9 (7.2)                    | 8.6 (6.7)                     | 7.9 (6.2)                     | 6.4 (6.2)                     | 7.3 (6.4)                      |
| <b>AUDIT total</b>     |                               |                              |                               |                               |                               |                                |
| Control                | 3.0 (2.6)                     | 1.7 (2.1)                    | 2.5 (2.4)                     | 2.1 (2.3)                     | 1.8 (2.4)                     | 1.9 (2.1)                      |
| Intervention           | 2.9 (3.2)                     | 1.6 (2.6)                    | 1.6 (2.7)                     | 2.1 (2.8)                     | 2.0 (2.6)                     | 2.2 (2.7)                      |
| <b>IPAS IA mean</b>    |                               |                              |                               |                               |                               |                                |
| Control                | 1.75 (1.27)                   | 1.13 (1.28)                  | 1.06 (1.22)                   | 1.21 (1.21)                   | 1.20 (1.45)                   | 1.15 (1.24)                    |
| Intervention           | 1.86 (1.15)                   | 1.25 (1.38)                  | 1.01 (1.16)                   | 1.32 (1.24)                   | 1.28 (1.25)                   | 1.32 (1.40)                    |
| <b>IPAS PM mean</b>    |                               |                              |                               |                               |                               |                                |
| Control                | 1.48 (1.14)                   | 0.78 (0.99)                  | 0.93 (1.06)                   | 0.98 (1.14)                   | 0.76 (1.11)                   | 0.84 (1.01)                    |
| Intervention           | 1.49 (1.02)                   | 0.94 (1.06)                  | 0.76 (0.93)                   | 1.11 (1.11)                   | 1.15 (1.06)                   | 1.04 (1.11)                    |
| <b>PSS scale total</b> |                               |                              |                               |                               |                               |                                |
| Control                | 5.3 (1.3)                     | 5.6 (1.0)                    | 5.2 (1.4)                     | 5.1 (1.4)                     | 5.2 (1.3)                     | 5.3 (1.3)                      |
| Intervention           | 5.2 (1.2)                     | 5.1 (1.4)                    | 5.1 (1.2)                     | 4.9 (1.5)                     | 5.1 (1.2)                     | 5.0 (1.4)                      |
| <b>SAL total</b>       |                               |                              |                               |                               |                               |                                |
| Control                | 85.3 (27.2)                   | 81.8 (18.6)                  | 86.2 (21.3)                   | 82.1 (28.9)                   | 83.9 (23.0)                   | 83.8 (27.9)                    |
| Intervention           | 81.3 (27.5)                   | 73.2 (25.2)                  | 71.5 (24.8)                   | 72.3 (29.1)                   | 72.2 (26.0)                   | 74.8 (26.1)                    |
| <b>SF-12 physical</b>  |                               |                              |                               |                               |                               |                                |
| Control                | 49.7 (10.6)                   | 38.5 (10.2)                  | 46.2 (9.6)                    | 45.8 (10.2)                   | 50.7 (8.4)                    | 46.5 (9.8)                     |
| Intervention           | 51.2 (8.9)                    | 34.8 (10.7)                  | 37.8 (12.3)                   | 41.3 (11.5)                   | 43.7 (10.8)                   | 43.5 (9.3)                     |
| <b>SF-12 mental</b>    |                               |                              |                               |                               |                               |                                |
| Control                | 48.9 (12.3)                   | 48.1 (12.8)                  | 46.9 (13.6)                   | 46.0 (12.4)                   | 45.1 (12.8)                   | 44.4 (11.7)                    |
| Intervention           | 48.6 (14.1)                   | 43.1 (13.0)                  | 43.4 (13.8)                   | 42.5 (13.0)                   | 46.3 (11.0)                   | 41.8 (14.8)                    |
| <b>SF-12 global</b>    |                               |                              |                               |                               |                               |                                |
| Control                | 48.2 (12.9)                   | 47.0 (11.7)                  | 49.5 (11.2)                   | 47.6 (11.7)                   | 49.9 (10.0)                   | 47.8 (11.1)                    |
| Intervention           | 50.1 (12.4)                   | 41.5 (14.0)                  | 42.4 (12.5)                   | 42.1 (13.3)                   | 43.1 (13.3)                   | 40.8 (12.3)                    |
| <b>ASSIST total</b>    |                               |                              |                               |                               |                               |                                |
| Control                | 21.6 (28.3)                   | 9.7 (14.9)                   | 7.2 (9.7)                     | 8.3 (9.8)                     | 8.8 (9.8)                     | 9.5 (12.8)                     |
| Intervention           | 22.8 (32.2)                   | 15.0 (28.1)                  | 10.8 (13.3)                   | 10.6 (15.2)                   | 8.0 (12.1)                    | 11.3 (17.3)                    |

PCL-C: PTSD Checklist Civilian Version (post-traumatic stress symptoms); PHQ-8: Patient Health Questionnaire (depression); AUDIT: The Alcohol Use Identification Test (alcohol use); IPAS: Impulsive-Premeditated Aggression Scale (aggression); IA: Impulsive Aggression; PM: Premeditated Aggression; MPSS: Multidimensional Scale of Perceived Social Support (social support); SAL: Satisfaction with Areas of Life (happiness). SF: Short Form Health Survey (health-related quality of life); ASSIST: Alcohol, Smoking and Substance Involvement Screening Test.
